# Supplementary material for: Stabilization of interpenetrating cluster-based frameworks promoted by N–H⋯X hydrogen bonds: synthesis, structures and properties of {[Cd(NH3)4]3[Re3Mo3Se8(CN)6]}X (X = Cl, Br and I)
Source: Royal Society of Chemistry journal article supplement (doi:10.1039/c8ce00527c), 2018-01-01
Supplement: c8ce00527c1.pdf [file c8ce00527c1.pdf]

## Electronic Supplementary Information

### Stabilization of interpenetrating cluster-based frameworks promoted by N-H...X hydrogen bonds: synthesis, structures and properties of $\{[\text{Cd}(\text{NH}_3)_4]_3[\text{Re}_3\text{Mo}_3\text{Se}_8(\text{CN})_6]\}\text{X}$ (X = Cl, Br and I).

Viktoria K. Muravieva,<sup>a, b</sup> Yakov M. Gayfulin,<sup>a</sup> Pierric Lemoine,<sup>b</sup>  
Nikolay G. Naumov,<sup>\* a, c</sup> Stéphane Cordier<sup>b</sup>

<sup>a</sup> Nikolaev Institute of Inorganic Chemistry SB RAS,  
3, Acad. Lavrentiev ave., Novosibirsk, 630090, Russia;  
E-mail: naumov@niic.nsc.ru ;

<sup>b</sup> Univ. Rennes, CNRS, ISCR (Institut des Sciences Chimiques de Rennes) - UMR 6226, F-35000,  
France ;

<sup>c</sup> Novosibirsk State University, 2, Pirogova str., Novosibirsk, 630090, Russia.

#### Table of contents:

- Table S1, Summary of single-crystal data collections and structure refinement conditions of 1-4: p. S2;
- Table S2, Selected hydrogen bond geometries for 1-4: p. S2-S3;
- Figure S1, IR spectra in KBr pellets for compounds 2-4: p. S3;
- Figures S2-S4, powder X-Ray diffraction (PXRD) patterns for compounds 2-4: p. S4;
- Figure S5, Selected hydrogen bonds in structure 1: p. S5;
- Figure S6, the structure of the asymmetric unit in 1: p. S5;
- Figure S7, TG and DTG diagrams for 2-4: p. S6;
- Figure S8, PXRD analysis for compounds 2 and 3 after heating and exposure under dry NH<sub>3</sub> vapor: p. S7.
- Figure S9, Tauc plot for 4 before heating and for sample heated in air at 100°C: p. S8.

**Table S1.** Summary of single-crystal data collections and structure refinement conditions of **1-4**.

| Compound                                              | <b>1</b>                                                                                                                        | <b>2</b>                                                                                                                       | <b>3</b>                                                                                                                       | <b>4</b>                                                                                                                      |
|-------------------------------------------------------|---------------------------------------------------------------------------------------------------------------------------------|--------------------------------------------------------------------------------------------------------------------------------|--------------------------------------------------------------------------------------------------------------------------------|-------------------------------------------------------------------------------------------------------------------------------|
| Chemical formula                                      | C <sub>12</sub> Cd <sub>5</sub> H <sub>76</sub> Mo <sub>6</sub> N <sub>34</sub> O <sub>5</sub> Re <sub>6</sub> Se <sub>16</sub> | C <sub>6</sub> Cd <sub>3</sub> Cl <sub>1</sub> H <sub>36</sub> Mo <sub>3</sub> N <sub>18</sub> Re <sub>3</sub> Se <sub>8</sub> | C <sub>6</sub> Br <sub>1</sub> Cd <sub>3</sub> H <sub>36</sub> Mo <sub>3</sub> N <sub>18</sub> Re <sub>3</sub> Se <sub>8</sub> | C <sub>6</sub> Cd <sub>3</sub> H <sub>36</sub> I <sub>1</sub> Mo <sub>3</sub> N <sub>18</sub> Re <sub>3</sub> Se <sub>8</sub> |
| Space group                                           | <i>P</i> -1                                                                                                                     | <i>R</i> -3                                                                                                                    | <i>R</i> -3                                                                                                                    | <i>R</i> -3                                                                                                                   |
| Temperature (K)                                       | 150                                                                                                                             | 150                                                                                                                            | 150                                                                                                                            | 150                                                                                                                           |
| Wavelength (Å)                                        | 0.71073                                                                                                                         | 0.71073                                                                                                                        | 0.71073                                                                                                                        | 0.71073                                                                                                                       |
| Formula weight (g.mol <sup>-1</sup> )                 | 4295.26                                                                                                                         | 2211.28                                                                                                                        | 2255.74                                                                                                                        | 2302.73                                                                                                                       |
| Crystal system                                        | triclinic                                                                                                                       | trigonal                                                                                                                       | trigonal                                                                                                                       | trigonal                                                                                                                      |
| a (Å)                                                 | 10.2664(8)                                                                                                                      | 15.0363(8)                                                                                                                     | 15.2258(10)                                                                                                                    | 15.3596(14)                                                                                                                   |
| b (Å)                                                 | 17.7456(11)                                                                                                                     | -                                                                                                                              | -                                                                                                                              | -                                                                                                                             |
| c (Å)                                                 | 22.3759(14)                                                                                                                     | 15.3935(9)                                                                                                                     | 15.3834(11)                                                                                                                    | 15.3897(13)                                                                                                                   |
| α (°)                                                 | 85.142(4)                                                                                                                       | 90                                                                                                                             | 90                                                                                                                             | 90                                                                                                                            |
| β (°)                                                 | 86.718(4)                                                                                                                       | 90                                                                                                                             | 90                                                                                                                             | 90                                                                                                                            |
| γ (°)                                                 | 88.258(4)                                                                                                                       | 120                                                                                                                            | 120                                                                                                                            | 120                                                                                                                           |
| V (Å <sup>3</sup> )                                   | 4053.9(5)                                                                                                                       | 3014.0(4)                                                                                                                      | 3088.5(5)                                                                                                                      | 3144.3(6)                                                                                                                     |
| Z                                                     | 2                                                                                                                               | 3                                                                                                                              | 3                                                                                                                              | 3                                                                                                                             |
| Calculated density (g.cm <sup>-3</sup> )              | 3.519                                                                                                                           | 3.655                                                                                                                          | 3.638                                                                                                                          | 3.648                                                                                                                         |
| Absorption coefficient (mm <sup>-1</sup> )            | 18.317                                                                                                                          | 18.796                                                                                                                         | 19.249                                                                                                                         | 18.691                                                                                                                        |
| F(000)                                                | 3824                                                                                                                            | 2946                                                                                                                           | 3000                                                                                                                           | 3054                                                                                                                          |
| Crystal size (mm)                                     | 0.16 × 0.06 × 0.04                                                                                                              | 0.06 × 0.05 × 0.04                                                                                                             | 0.18 × 0.10 × 0.09                                                                                                             | 0.20 × 0.17 × 0.14                                                                                                            |
| Crystal color                                         | dark purple                                                                                                                     | dark purple                                                                                                                    | dark purple                                                                                                                    | dark purple                                                                                                                   |
| Theta range (°)                                       | 2.949 - 27.510                                                                                                                  | 3.074 - 27.479                                                                                                                 | 3.066 - 27.484                                                                                                                 | 3.058 - 27.483                                                                                                                |
| h_min, h_max                                          | -13, 13                                                                                                                         | -19, 19                                                                                                                        | -19, 19                                                                                                                        | -19, 19                                                                                                                       |
| k_min, k_max                                          | -13, 22                                                                                                                         | -19, 19                                                                                                                        | -19, 19                                                                                                                        | -19, 19                                                                                                                       |
| l_min, l_max                                          | -29, 29                                                                                                                         | -17, 19                                                                                                                        | -19, 19                                                                                                                        | -19, 19                                                                                                                       |
| R(int)                                                | 0.0662                                                                                                                          | 0.0329                                                                                                                         | 0.0422                                                                                                                         | 0.0416                                                                                                                        |
| Reflections collected                                 | 31877                                                                                                                           | 6288                                                                                                                           | 14709                                                                                                                          | 12940                                                                                                                         |
| Reflections unique [I > 2σ]                           | 9447                                                                                                                            | 1302                                                                                                                           | 1440                                                                                                                           | 1488                                                                                                                          |
| Completeness                                          | 0.962                                                                                                                           | 0.997                                                                                                                          | 0.999                                                                                                                          | 0.999                                                                                                                         |
| Data/restraints/parameters                            | 17950/42/650                                                                                                                    | 1533/0/69                                                                                                                      | 1571/0/69                                                                                                                      | 1609/0/69                                                                                                                     |
| Goodness-of-fit                                       | 0.964                                                                                                                           | 1.088                                                                                                                          | 1.109                                                                                                                          | 1.077                                                                                                                         |
| Final R1 [I > 2σ]                                     | 0.0620                                                                                                                          | 0.0271                                                                                                                         | 0.0148                                                                                                                         | 0.0277                                                                                                                        |
| Final wR2 [I > 2σ]                                    | 0.1149                                                                                                                          | 0.0672                                                                                                                         | 0.0340                                                                                                                         | 0.0724                                                                                                                        |
| Largest difference peak and hole (e.Å <sup>-3</sup> ) | 2.448 and -2.851                                                                                                                | 1.362 and -1.617                                                                                                               | 0.507 and -0.890                                                                                                               | 1.876 and -2.650                                                                                                              |

**Table S2.** Selected hydrogen bond geometries for **1-4**.

| D-H...A                        | D-H (Å) | H...A (Å) | D...A (Å) | D-H...A (°) |
|--------------------------------|---------|-----------|-----------|-------------|
| <b>Compound 1*</b>             |         |           |           |             |
| N13-H13B...N11 <sup>i</sup>    | 0.890   | 2.305     | 3.009     | 136         |
| N15-H15A...N6 <sup>ii</sup>    | 0.890   | 2.351     | 3.221     | 166         |
| N15-H15B...O37 <sup>iii</sup>  | 0.890   | 2.432     | 3.213     | 147         |
| N17-H17B...O37 <sup>iv</sup>   | 0.890   | 2.083     | 2.926     | 158         |
| N17-H17C...N4 <sup>v</sup>     | 0.890   | 2.402     | 3.242     | 157         |
| N20-H20B...N3 <sup>vi</sup>    | 0.890   | 2.451     | 3.105     | 131         |
| N20-H20C...N11 <sup>vii</sup>  | 0.890   | 2.322     | 3.036     | 137         |
| N21-H21B...N11 <sup>i</sup>    | 0.890   | 2.411     | 3.240     | 155         |
| N22-H22C...N8 <sup>viii</sup>  | 0.890   | 2.527     | 3.269     | 141         |
| N24-H24C...N7 <sup>ix</sup>    | 0.890   | 2.332     | 3.134     | 150         |
| N26-H26A...O38 <sup>x</sup>    | 0.890   | 2.377     | 3.214     | 157         |
| N28-H28A...N2 <sup>xi</sup>    | 0.890   | 2.467     | 3.272     | 150         |
| N28-H28C...N2 <sup>xii</sup>   | 0.890   | 2.297     | 3.103     | 151         |
| N29-H29A...O39 <sup>xiii</sup> | 0.890   | 2.424     | 3.235     | 152         |
| N29-H29C...O38 <sup>x</sup>    | 0.890   | 2.337     | 3.220     | 172         |

|                               |       |       |       |     |
|-------------------------------|-------|-------|-------|-----|
| N30-H30C...N10 <sup>xiv</sup> | 0.890 | 2.231 | 3.049 | 153 |
| N31-H31B...N10 <sup>xiv</sup> | 0.890 | 2.471 | 3.209 | 141 |
| N32-H32A...O35 <sup>xv</sup>  | 0.890 | 2.331 | 3.139 | 151 |
| N34-H34B...N7 <sup>xvi</sup>  | 0.890 | 2.217 | 3.102 | 173 |
| <b>Compound 2</b>             |       |       |       |     |
| N2-H2...Cl <sup>a</sup>       | 0.890 | 2.543 | 3.334 | 148 |
| N2-H2...N1 <sup>b</sup>       | 0.890 | 2.371 | 3.246 | 168 |
| <b>Compound 3</b>             |       |       |       |     |
| N2-H2...Br <sup>a</sup>       | 0.890 | 2.633 | 3.468 | 157 |
| N2-H2...N1 <sup>c</sup>       | 0.890 | 2.383 | 3.267 | 171 |
| <b>Compound 4</b>             |       |       |       |     |
| N2-H2...I <sup>a</sup>        | 0.910 | 2.833 | 3.641 | 149 |
| N2-H2...N1 <sup>b</sup>       | 0.910 | 2.380 | 3.261 | 163 |

\* Hydrogen atoms on lattice water were not located, hydrogen bonds for **1** were selected with criteria for M-NH<sub>3</sub> donor group D...A < 3.28 Å. [1]

Symmetry codes: (i) -x+2, -y+1, -z+2 (ii) -x+1, -y+1, -z+2 (iii) x+1, y, z+1 (iv) x, y, z+1 (v) -x+1, -y+1, -z+2 (vi) -x+1, -y+1, -z+1 (vii) -x+2, -y+1, -z+1 (viii) x, y, z (ix) -x+2, -y+1, -z+1 (x) x+1, y-1, z (xi) -x+1, -y, -z+2 (xii) x+1, y, z (xiii) -x+2, -y, -z+1 (xiv) -x+2, -y+2, -z+1 (xv) -x+1, -y+1, -z+1 (xvi) x-1, y, z.

(a) x, y, z; (b) -y+2/3, x-y+1/3, z+1/3; (c) -x+y-1/3, -x+1/3, z+1/3.

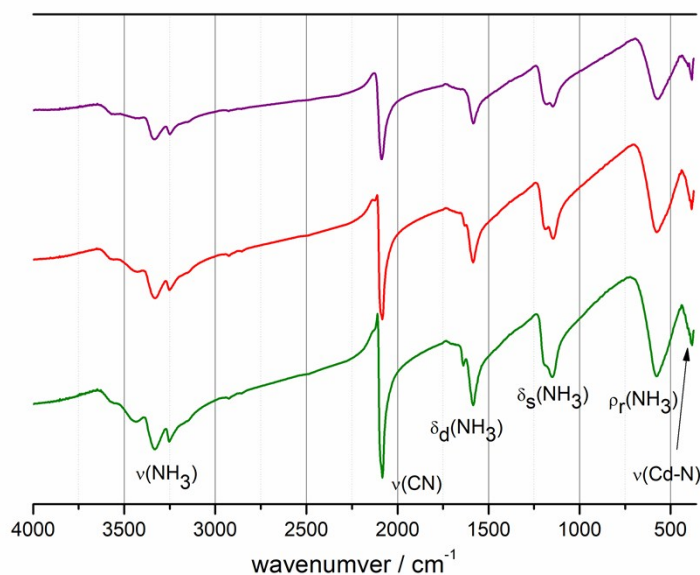

**Figure S1.** FT-IR spectra in KBr pellets for compounds: **2**(green line), **3** (red line) and **4** (purple line).

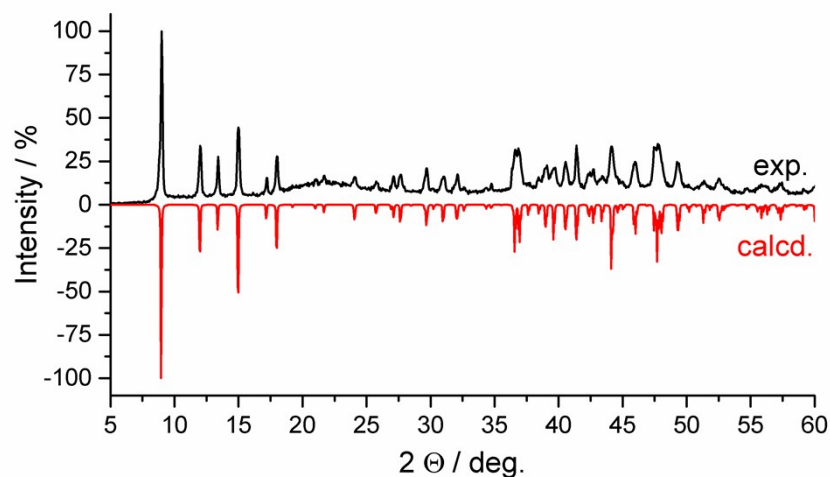

**Figure S2.** Powder XRD patterns (recorded, black vs calculated, red) for compound **2**. Refined parameters:  $a = 14.78(1) \text{ \AA}$ ,  $c = 15.49(1) \text{ \AA}$ .

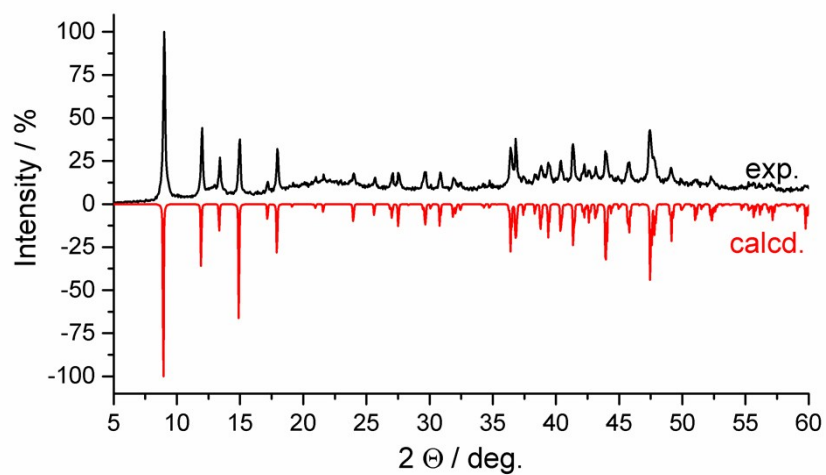

**Figure S3.** Powder XRD patterns (recorded, black vs calculated, red) for compound **3**. Refined parameters  $a = 14.86(1) \text{ \AA}$ ,  $c = 15.49(1) \text{ \AA}$ .

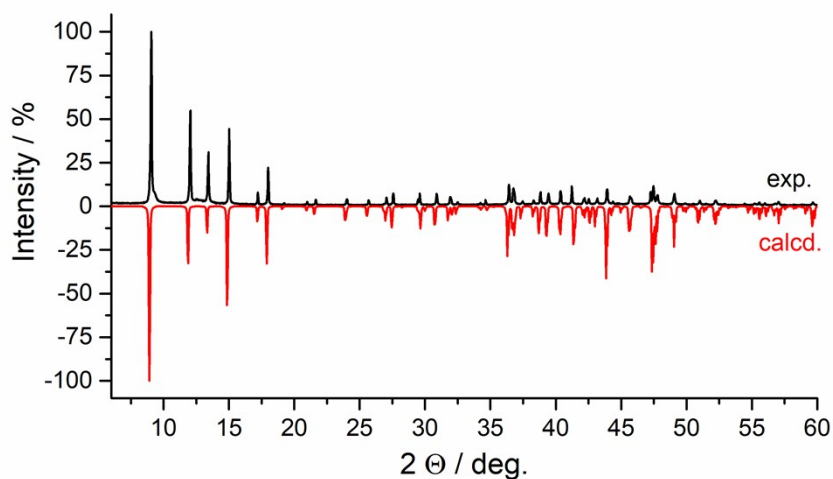

**Figure S4.** Powder XRD patterns (recorded, black vs calculated, red) for compound **4**. Refined parameters  $a = 14.90(1) \text{ \AA}$ ,  $c = 15.49(1) \text{ \AA}$ .

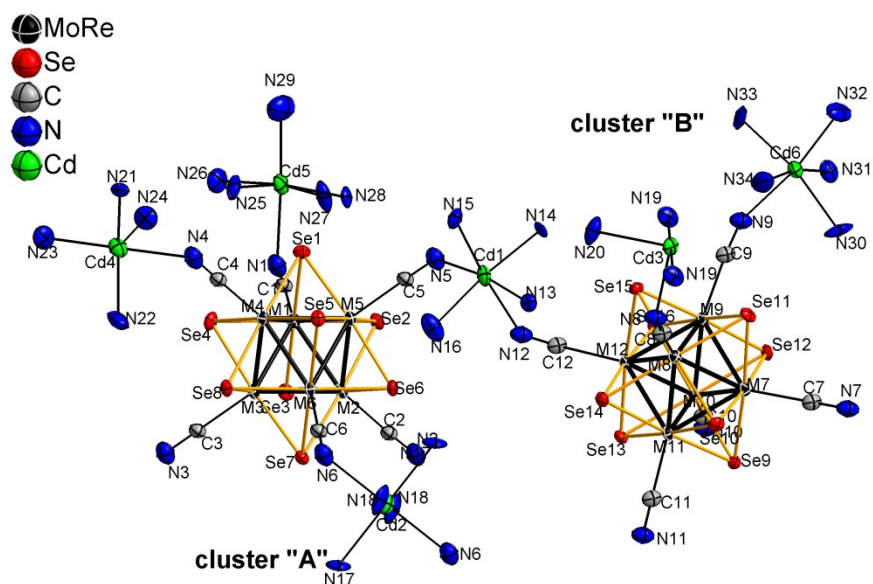

**Figure S5.** The structure of the asymmetric unit in **1**. Hydrogen atoms of ammonia molecules are omitted for clarity, ORTEP drawing of 75% probability level.

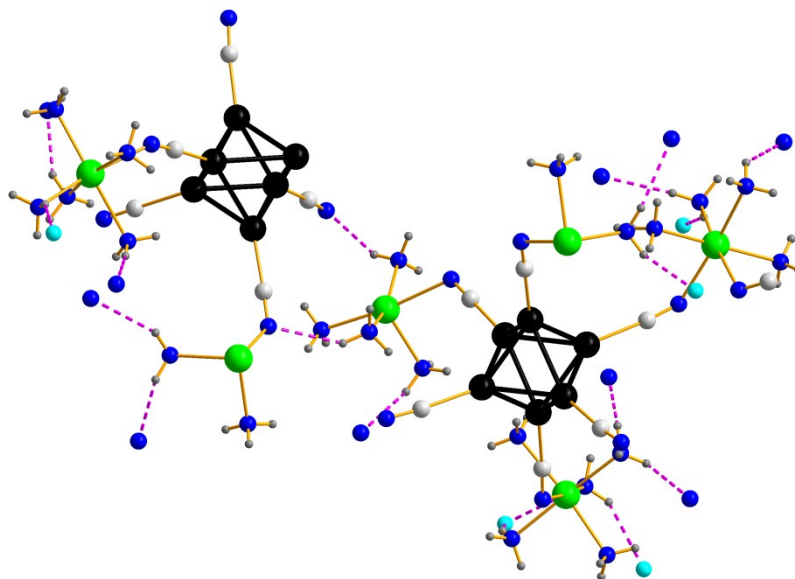

**Figure S6.** Selected hydrogen bonds (dash lines, magenta colored) location in structure **1**. Selenium atoms were omitted for clarity.

a)

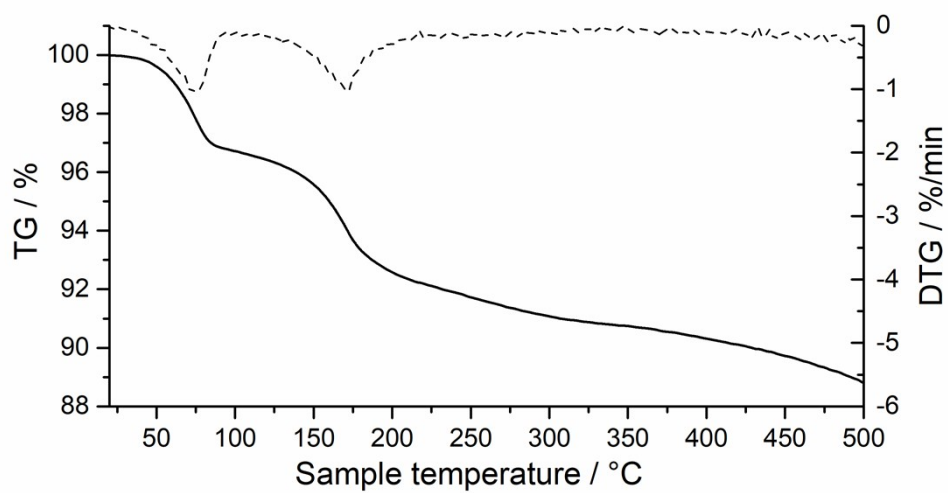

b)

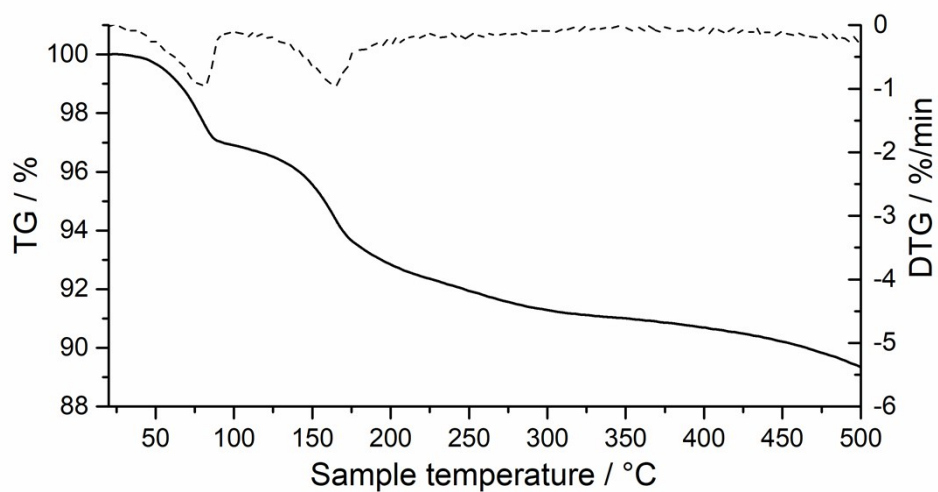

c)

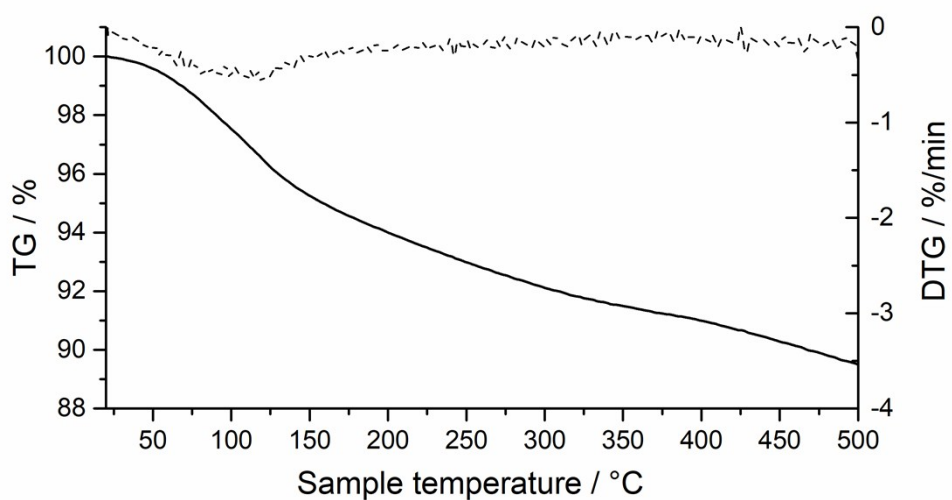

**Figure S7.** TG and DTG diagrams for **2** (a), **3** (b) and **4** (c)

a)

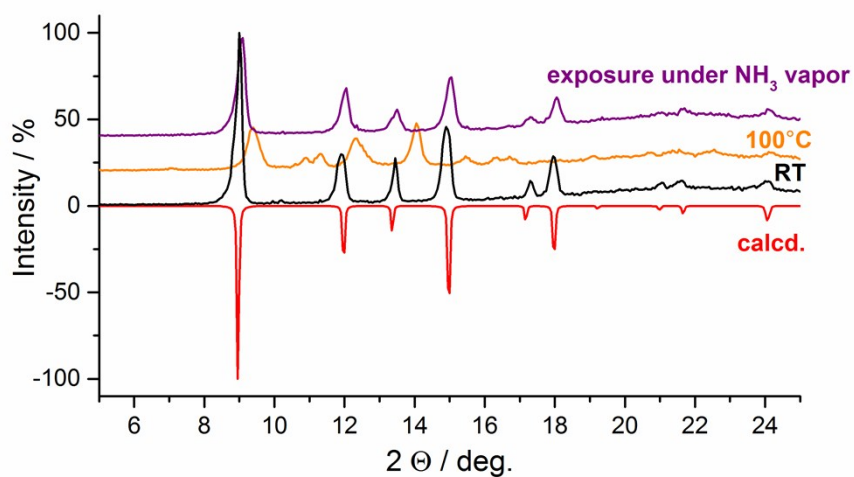

b)

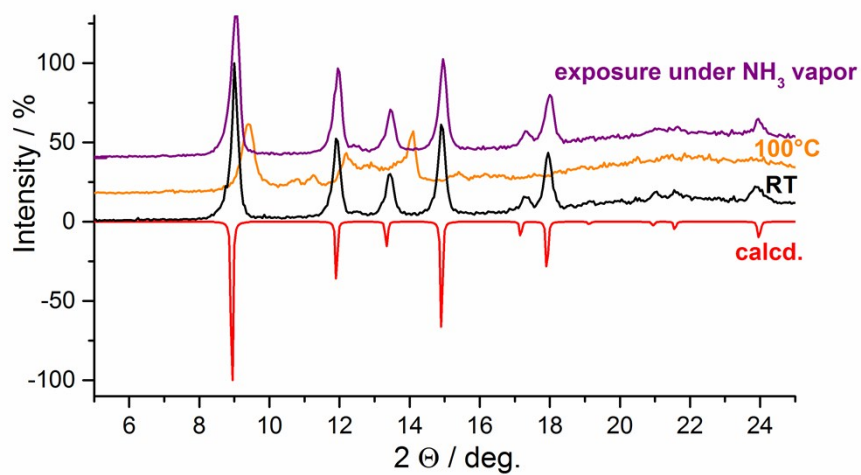

**Figure S8.** Powder XRD analysis for a) the sample of **2** and b) the sample of **3**. Red line represents the calculated pattern; black line was obtained for sample at room temperature; orange lines corresponds to samples heated for several minutes 100°C. Purple lines are for samples after exposure under dry NH<sub>3</sub> vapor.

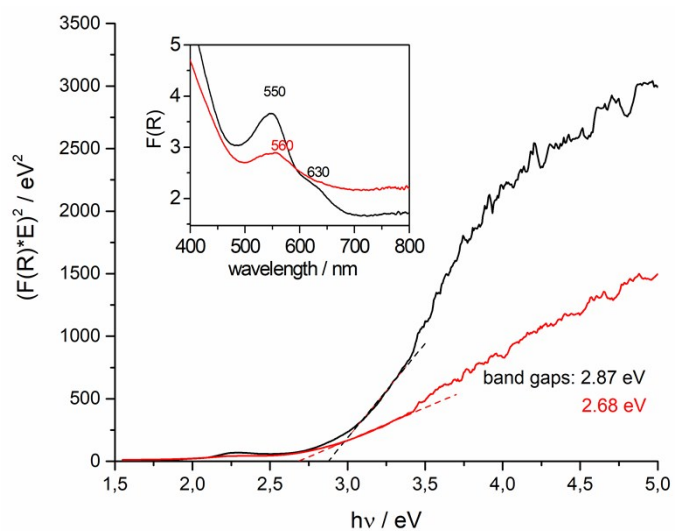

**Figure S9.** Tauc plot for **4** before heating (black line) and for sample heated in air at 100°C for several minutes (red line) calculated from diffuse reflectance spectra, on the onset there are initial diffuse reflectance spectra (DRS) with characteristic cluster bands.

## References

1. T. Steiner, *Angew. Chem. Int. Ed.*, **2002**, 41, 48-76.
